# Supplementary material for: An investigation of the pigments, antioxidants and free radical scavenging potential of twenty medicinal weeds found in the southern part of Bangladesh
Source: PeerJ. 2024 Jul 23;12:e17698. doi: 10.7717/peerj.17698 (PMC11276756; doi:10.7717/peerj.17698)
Supplement: Supplemental Information 2 [file peerj-12-17698-s002.xlsx]

## Sheet: Raw data_Fig. 1
Raw data for Figure 1: Data for Boxplots illustrating the descriptive statistics of quantity of different pigments, biochemical compositions and antioxidantal properties in leaves and stems of selected twenty medicinal weed species.
Plant Species	Chlorophyll a		Chlorophyll b		Total chlorophyll		Carotenoids		Total phenolic		Total flavonoid		IC50 value to scavenge DPPH (mg mL-1)
	(μg g-1 FW)		(μg g-1 FW)		(μg g-1 FW)		(μg g-1 FW)		(mg GAE 100g-1 FW)		(mg CE 100g-1 FW)		(mg mL-1)
	Stem	Leaf	Stem	Leaf	Stem	Leaf	Stem	Leaf	Stem	Leaf	Stem	Leaf	Stem	Leaf
Oxalis corniculata	181.31	359.58	166.54	246.09	347.86	605.67	28.02	82.07	399.23	93.03	153.22	636.92	34.84	28.8
Oxalis corniculata	140.47	397.97	126.69	274.18	267.16	672.15	25.75	114.1	420	138.75	344.8	590.77	26.31	10
Oxalis corniculata	142.11	320.04	126.28	300.9	268.39	620.94	14.21	53.56	523.85	108.67	158.45	641.54	38.85	64.9
Heliotropium indicum	153.52	349.74	111.67	288.53	265.19	638.28	28.03	69.94	346.15	1098.03	158.5	399.23	13.98	0.45
Heliotropium indicum	140.3	436.11	80.4	75.25	220.7	511.36	30.27	190.83	302.31	744.48	127.12	420	10.03	3.63
Heliotropium indicum	160.67	327.58	82.02	210.75	242.69	538.33	38.91	41.77	350.77	615.92	324.88	523.85	12.01	3.44
Eclipta postrata	110.81	240.4	74.66	254.31	185.47	494.71	28.35	26.41	143.08	431.44	145.07	856.15	33.34	18.3
Eclipta postrata	88.49	226.58	59.1	273.6	147.59	500.18	21.81	13.49	117.69	696.56	102.85	837.69	55.06	33.63
Eclipta postrata	71.33	229.47	60.87	273.22	132.2	502.69	7.67	17.42	87.69	698.36	60.04	1218.46	48.13	37.38
Euphorbia hirta	132.38	327.93	97.73	180.66	230.1	508.59	24.21	92.28	242.31	2399.62	655.99	593.08	16.14	1.97
Euphorbia hirta	119.75	331.65	90.21	204.76	209.96	536.41	23.7	92.89	163.85	959.57	365.71	853.85	16.39	13.77
Euphorbia hirta	121.12	244.25	87.62	202.8	208.74	447.06	58.26	46.8	180	1807.82	350.91	780	23.67	18.52
Portulaca oleracea	105.13	224.11	64.28	274.05	169.41	498.16	26.13	6.9	62.31	106.32	132.38	288.46	42.39	71.89
Portulaca oleracea	102.17	230.69	63.65	228.05	165.82	458.74	26.46	22.24	9.23	93.81	102.15	606.92	45.89	61.63
Portulaca oleracea	121.98	195.31	73.94	152.76	195.92	348.07	31.4	30.89	228.46	78.17	39.98	636.92	48.15	79.61
Alternanthera sessilis	157.15	319.74	113.01	91.78	270.17	411.51	30.59	124.34	117.69	345.08	53.61	544.62	118.69	32.49
Alternanthera sessilis	142.73	302.58	93.62	128.21	236.35	430.79	31.86	101.6	60	247.92	61.98	143.08	135.3	32.12
Alternanthera sessilis	137.21	277.23	78.27	133.98	215.48	411.21	33.35	88.69	62.31	278.73	29.97	542.31	103.04	36.5
Scoparia dulcis	330.16	391.55	186.18	298.64	516.34	690.19	62.49	83.93	94.62	538.64	166.84	833.08	37.25	17.74
Scoparia dulcis	281.66	238.41	164.93	214.44	446.6	452.85	57.02	41.19	226.15	423.27	202.12	1211.54	39.48	17.74
Scoparia dulcis	335.84	252.38	190.87	178.72	526.71	431.1	70.62	61.24	180	584.65	158.9	1257.69	38.18	26.87
Centella verticillata	104.27	244.28	98.78	239.94	203.06	484.22	6.39	36.16	177.69	629.57	126.64	530.77	40.2	10.45
Centella verticillata	122.25	236.73	95.63	211.95	217.88	448.68	15.82	37.18	143.08	821.98	134.45	664.62	40.93	18.12
Centella verticillata	101.36	286.48	79.19	213	180.55	499.48	14.61	63.08	96.92	565.66	142.84	586.15	38.04	9.61
Acalypha indica	176.58	322.12	99.43	169.88	276.01	492	105.34	101.58	336.92	303.54	134.76	948.46	36.71	28.25
Acalypha indica	189.3	352.9	119.77	332.57	309.07	685.47	43.1	56.79	353.08	342.06	102.76	726.92	33.64	24.81
Acalypha indica	173.97	333.26	111.21	155.61	285.18	488.87	39.56	108.77	258.46	305.65	116.62	627.69	35.75	29.76
Synedrella nodiflora	78.68	236.94	57.95	217.72	136.63	454.65	19	38.49	219.23	0	80.76	990	89.29	39.49
Synedrella nodiflora	109.88	255.65	65.87	206.34	175.74	461.99	27.66	52.64	212.31	149.62	92.67	978.46	130.7	40.49
Synedrella nodiflora	117.87	255.62	87.4	208.77	205.27	464.39	28.14	48.93	246.92	155.83	90.16	701.54	90.78	39.2
Persicaria lapathifolia	83.43	264.45	47.13	122.09	130.55	386.55	19.01	88.85	350.77	1023.1	262.1	1504.62	26.05	11.79
Persicaria lapathifolia	88.33	245	49.97	142.4	138.3	387.4	20.4	70.33	440.77	1299.26	288.72	1737.69	22.97	6.19
Persicaria lapathifolia	69.84	258.09	39.86	134.44	109.7	392.54	16.9	80.8	436.15	1283.62	220.97	1569.23	23.55	10.99
Ageratum conyzoides	254.43	247.61	116.92	221.07	371.35	468.68	79.05	44.85	396.92	143.59	82.96	969.23	42.28	52.01
Ageratum conyzoides	255.38	242.42	87.54	222.97	342.92	465.39	85.71	42.04	295.38	206.7	94.87	1070.77	56.79	29.73
Ageratum conyzoides	265.51	257.98	142.07	112.93	407.58	370.91	76.63	85.76	459.23	104.76	91.07	620.77	46.47	99.77
Trema orientalis	129.18	247.69	67.14	165.04	196.32	412.73	30.49	63.99	274.62	217.85	80.26	895.38	112.38	98.29
Trema orientalis	131.13	247.83	56.85	164.96	187.98	412.78	34.91	64.45	286.15	212.11	80.26	708.46	70.71	162.07
Trema orientalis	128.73	248.63	77.03	164.47	205.76	413.1	25.7	65.01	244.62	230.88	74.01	653.08	183.93	106.81
Senna occidentalis	107.84	264.75	93.71	106.12	201.54	370.87	41.98	99.04	623.08	518.04	239.21	1601.54	43.71	23.63
Senna occidentalis	92.67	263.42	70.16	106.93	162.82	370.35	45.29	97.91	553.85	493.02	199.08	1839.23	50.91	30.58
Senna occidentalis	111.62	262.61	85.58	107.42	197.2	370.03	51.67	97.54	669.23	510.74	223.58	1433.08	42.77	29.59
Parthenium hysterophorus	73.5	223.75	42.72	300.97	116.22	524.72	13.13	4.42	410.77	665.53	255.89	570	10.72	1.53
Parthenium hysterophorus	76.36	223.21	45.11	301.3	121.47	524.51	12.89	2.74	373.85	642.59	248.59	553.85	7.49	7.13
Parthenium hysterophorus	79.62	223.21	47.26	301.3	126.87	524.51	15.25	3.79	429.23	727.54	341.88	669.23	8.48	5.83
Coccinia grandis	209.07	258.21	144.82	110.1	353.89	368.3	54.64	89.97	212.31	276.22	128.21	660	30.19	22.93
Coccinia grandis	202.33	258.21	159.84	110.1	362.17	368.3	46.45	91.41	327.69	329.9	92.77	800.77	31.57	19.61
Coccinia grandis	205.63	258.47	168.03	109.94	373.66	368.41	45.26	91.87	246.92	314.26	107.36	565.38	35.29	20.94
Bryophytllum calycinum	48.68	226.49	33.29	267.75	81.97	494.23	11.28	15.27	302.31	418.49	182.41	904.62	19.09	9.52
Bryophytllum calycinum	48.85	224.93	30.51	264.08	79.36	489.01	11.38	15.99	274.62	429.96	110.49	773.08	22.88	7.78
Bryophytllum calycinum	58.41	273.97	38.49	225	96.9	498.97	13.01	47.72	260.77	402.13	86.93	613.85	19.55	7.07
Ruellia tuberosa	81.99	255.55	83.44	135.99	165.43	391.54	14.31	81.69	717.69	635.3	1135.61	1107.69	7.04	23
Ruellia tuberosa	85.66	254.62	77.81	136.55	163.47	391.17	14.75	80.81	625.38	659.79	1110.6	1509.23	6.16	27.03
Ruellia tuberosa	76.65	255.42	82.32	136.07	158.97	391.49	9.58	81.56	616.15	774.45	686.89	1363.85	4.68	20.69
Enhydra fluctuans	55.57	239.18	28.13	218.76	83.7	457.95	12.09	43.33	415.38	602.46	143.32	1345.38	43.31	21.9
Enhydra fluctuans	58.61	237.45	30.16	219.82	88.78	457.26	12.25	42.14	313.85	550.87	140.71	1301.54	46.84	20.64
Enhydra fluctuans	80.58	237.18	42.79	219.98	123.37	457.16	14.7	41.88	346.15	542.53	170.94	1317.69	33.53	23.58
Tridax procumbens	66.4	241.3	45	193.2	111.4	434.5	11.84	52.67	440.77	802.07	441.43	1433.08	16.52	1.02
Tridax procumbens	68.82	242.24	37.5	192.63	113.17	434.87	15.56	53.69	466.15	891.19	488.85	1467.69	4.77	2.35
Tridax procumbens	68.82	243.3	44.35	191.98	113.17	435.29	11.84	54.7	362.31	959.98	280.91	1682.31	14.34	6.55

## Sheet: Raw data_Fig. 2
Raw data for Figure 2: Data for Bi-directional bar graph showing data on the amount of chlorophyll a content, chlorophyll b content, of total chlorophyll content. And carotenoids content in the leaf and stem of twenty medicinal weeds.
Plant Species	Plant Parts
	Stem				Leaf
	Chlorophyll a	Chlorophyll b	Total chlorophyll	Carotenoids	Chlorophyll a	Chlorophyll b	Total chlorophyll	Carotenoids
	(μg g-1 FW)	(μg g-1 FW)	(μg g-1 FW)	(μg g-1 FW)	(μg g-1 FW)	(μg g-1 FW)	(μg g-1 FW)	(μg g-1 FW)
Oxalis corniculata	181.31	166.54	347.86	28.02	359.58	246.09	605.67	82.07
Oxalis corniculata	140.47	126.69	267.16	25.75	397.97	274.18	672.15	114.1
Oxalis corniculata	142.11	126.28	268.39	14.21	320.04	300.9	620.94	53.56
Heliotropium indicum	153.52	111.67	265.19	28.03	349.74	288.53	638.28	69.94
Heliotropium indicum	140.3	80.4	220.7	30.27	436.11	75.25	511.36	190.83
Heliotropium indicum	160.67	82.02	242.69	38.91	327.58	210.75	538.33	41.77
Eclipta postrata	110.81	74.66	185.47	28.35	240.4	254.31	494.71	26.41
Eclipta postrata	88.49	59.1	147.59	21.81	226.58	273.6	500.18	13.49
Eclipta postrata	71.33	60.87	132.2	7.67	229.47	273.22	502.69	17.42
Euphorbia hirta	132.38	97.73	230.1	24.21	327.93	180.66	508.59	92.28
Euphorbia hirta	119.75	90.21	209.96	23.7	331.65	204.76	536.41	92.89
Euphorbia hirta	121.12	87.62	208.74	58.26	244.25	202.8	447.06	46.8
Portulaca oleracea	105.13	64.28	169.41	26.13	224.11	274.05	498.16	6.9
Portulaca oleracea	102.17	63.65	165.82	26.46	230.69	228.05	458.74	22.24
Portulaca oleracea	121.98	73.94	195.92	31.4	195.31	152.76	348.07	30.89
Alternanthera sessilis	157.15	113.01	270.17	30.59	319.74	91.78	411.51	124.34
Alternanthera sessilis	142.73	93.62	236.35	31.86	302.58	128.21	430.79	101.6
Alternanthera sessilis	137.21	78.27	215.48	33.35	277.23	133.98	411.21	88.69
Scoparia dulcis	330.16	186.18	516.34	62.49	391.55	298.64	690.19	83.93
Scoparia dulcis	281.66	164.93	446.6	57.02	238.41	214.44	452.85	41.19
Scoparia dulcis	335.84	190.87	526.71	70.62	252.38	178.72	431.1	61.24
Centella verticillata	104.27	98.78	203.06	6.39	244.28	239.94	484.22	36.16
Centella verticillata	122.25	95.63	217.88	15.82	236.73	211.95	448.68	37.18
Centella verticillata	101.36	79.19	180.55	14.61	286.48	213	499.48	63.08
Acalypha indica	176.58	99.43	276.01	105.34	322.12	169.88	492	101.58
Acalypha indica	189.3	119.77	309.07	43.1	352.9	332.57	685.47	56.79
Acalypha indica	173.97	111.21	285.18	39.56	333.26	155.61	488.87	108.77
Synedrella nodiflora	78.68	57.95	136.63	19	236.94	217.72	454.65	38.49
Synedrella nodiflora	109.88	65.87	175.74	27.66	255.65	206.34	461.99	52.64
Synedrella nodiflora	117.87	87.4	205.27	28.14	255.62	208.77	464.39	48.93
Persicaria lapathifolia	83.43	47.13	130.55	19.01	264.45	122.09	386.55	88.85
Persicaria lapathifolia	88.33	49.97	138.3	20.4	245	142.4	387.4	70.33
Persicaria lapathifolia	69.84	39.86	109.7	16.9	258.09	134.44	392.54	80.8
Ageratum conyzoides	254.43	116.92	371.35	79.05	247.61	221.07	468.68	44.85
Ageratum conyzoides	255.38	87.54	342.92	85.71	242.42	222.97	465.39	42.04
Ageratum conyzoides	265.51	142.07	407.58	76.63	257.98	112.93	370.91	85.76
Trema orientalis	129.18	67.14	196.32	30.49	247.69	165.04	412.73	63.99
Trema orientalis	131.13	56.85	187.98	34.91	247.83	164.96	412.78	64.45
Trema orientalis	128.73	77.03	205.76	25.7	248.63	164.47	413.1	65.01
Senna occidentalis	107.84	93.71	201.54	41.98	264.75	106.12	370.87	99.04
Senna occidentalis	92.67	70.16	162.82	45.29	263.42	106.93	370.35	97.91
Senna occidentalis	111.62	85.58	197.2	51.67	262.61	107.42	370.03	97.54
Parthenium hysterophorus	73.5	42.72	116.22	13.13	223.75	300.97	524.72	4.42
Parthenium hysterophorus	76.36	45.11	121.47	12.89	223.21	301.3	524.51	2.74
Parthenium hysterophorus	79.62	47.26	126.87	15.25	223.21	301.3	524.51	3.79
Coccinia grandis	209.07	144.82	353.89	54.64	258.21	110.1	368.3	89.97
Coccinia grandis	202.33	159.84	362.17	46.45	258.21	110.1	368.3	91.41
Coccinia grandis	205.63	168.03	373.66	45.26	258.47	109.94	368.41	91.87
Bryophytllum calycinum	48.68	33.29	81.97	11.28	226.49	267.75	494.23	15.27
Bryophytllum calycinum	48.85	30.51	79.36	11.38	224.93	264.08	489.01	15.99
Bryophytllum calycinum	58.41	38.49	96.9	13.01	273.97	225	498.97	47.72
Ruellia tuberosa	81.99	83.44	165.43	14.31	255.55	135.99	391.54	81.69
Ruellia tuberosa	85.66	77.81	163.47	14.75	254.62	136.55	391.17	80.81
Ruellia tuberosa	76.65	82.32	158.97	9.58	255.42	136.07	391.49	81.56
Enhydra fluctuans	55.57	28.13	83.7	12.09	239.18	218.76	457.95	43.33
Enhydra fluctuans	58.61	30.16	88.78	12.25	237.45	219.82	457.26	42.14
Enhydra fluctuans	80.58	42.79	123.37	14.7	237.18	219.98	457.16	41.88
Tridax procumbens	66.4	45	111.4	11.84	241.3	193.2	434.5	52.67
Tridax procumbens	68.82	37.5	113.17	15.56	242.24	192.63	434.87	53.69
Tridax procumbens	68.82	44.35	113.17	11.84	243.3	191.98	435.29	54.7

## Sheet: Raw data_Fig. 3
Raw data for Figure 3: Data for Bi-directional bar graph showing data on the amount of total phenolics content, total flavonoid content, and IC50 value to scavenge DPPH free radicals in the leaf and stem of twenty medicinal weeds.
Plant Species	Plant Parts
	Stem			Leaf
	Total phenolic	Total flavonoid	IC50 value to scavenge DPPH (mg mL-1)	Total phenolic	Total flavonoid	IC50 value to scavenge DPPH (mg mL-1)
	(mg GAE 100g-1 FW)	(mg CE 100g-1 FW)		(mg GAE 100g-1 FW)	(mg CE 100g-1 FW)
Oxalis corniculata	399.23	153.22	34.84	93.03	636.92	28.8
Oxalis corniculata	420	344.8	26.31	138.75	590.77	10
Oxalis corniculata	523.85	158.45	38.85	108.67	641.54	64.9
Heliotropium indicum	346.15	158.5	13.98	1098.03	399.23	0.45
Heliotropium indicum	302.31	127.12	10.03	744.48	420	3.63
Heliotropium indicum	350.77	324.88	12.01	615.92	523.85	3.44
Eclipta postrata	143.08	145.07	33.34	431.44	856.15	18.3
Eclipta postrata	117.69	102.85	55.06	696.56	837.69	33.63
Eclipta postrata	87.69	60.04	48.13	698.36	1218.46	37.38
Euphorbia hirta	242.31	655.99	16.14	2399.62	593.08	1.97
Euphorbia hirta	163.85	365.71	16.39	959.57	853.85	13.77
Euphorbia hirta	180	350.91	23.67	1807.82	780	18.52
Portulaca oleracea	62.31	132.38	42.39	106.32	288.46	71.89
Portulaca oleracea	9.23	102.15	45.89	93.81	606.92	61.63
Portulaca oleracea	228.46	39.98	48.15	78.17	636.92	79.61
Alternanthera sessilis	117.69	53.61	118.69	345.08	544.62	32.49
Alternanthera sessilis	60	61.98	135.3	247.92	143.08	32.12
Alternanthera sessilis	62.31	29.97	103.04	278.73	542.31	36.5
Scoparia dulcis	94.62	166.84	37.25	538.64	833.08	17.74
Scoparia dulcis	226.15	202.12	39.48	423.27	1211.54	17.74
Scoparia dulcis	180	158.9	38.18	584.65	1257.69	26.87
Centella verticillata	177.69	126.64	40.2	629.57	530.77	10.45
Centella verticillata	143.08	134.45	40.93	821.98	664.62	18.12
Centella verticillata	96.92	142.84	38.04	565.66	586.15	9.61
Acalypha indica	336.92	134.76	36.71	303.54	948.46	28.25
Acalypha indica	353.08	102.76	33.64	342.06	726.92	24.81
Acalypha indica	258.46	116.62	35.75	305.65	627.69	29.76
Synedrella nodiflora	219.23	80.76	89.29	0	990	39.49
Synedrella nodiflora	212.31	92.67	130.7	149.62	978.46	40.49
Synedrella nodiflora	246.92	90.16	90.78	155.83	701.54	39.2
Persicaria lapathifolia	350.77	262.1	26.05	1023.1	1504.62	11.79
Persicaria lapathifolia	440.77	288.72	22.97	1299.26	1737.69	6.19
Persicaria lapathifolia	436.15	220.97	23.55	1283.62	1569.23	10.99
Ageratum conyzoides	396.92	82.96	42.28	143.59	969.23	52.01
Ageratum conyzoides	295.38	94.87	56.79	206.7	1070.77	29.73
Ageratum conyzoides	459.23	91.07	46.47	104.76	620.77	99.77
Trema orientalis	274.62	80.26	112.38	217.85	895.38	98.29
Trema orientalis	286.15	80.26	70.71	212.11	708.46	162.07
Trema orientalis	244.62	74.01	183.93	230.88	653.08	106.81
Senna occidentalis	623.08	239.21	43.71	518.04	1601.54	23.63
Senna occidentalis	553.85	199.08	50.91	493.02	1839.23	30.58
Senna occidentalis	669.23	223.58	42.77	510.74	1433.08	29.59
Parthenium hysterophorus	410.77	255.89	10.72	665.53	570	1.53
Parthenium hysterophorus	373.85	248.59	7.49	642.59	553.85	7.13
Parthenium hysterophorus	429.23	341.88	8.48	727.54	669.23	5.83
Coccinia grandis	212.31	128.21	30.19	276.22	660	22.93
Coccinia grandis	327.69	92.77	31.57	329.9	800.77	19.61
Coccinia grandis	246.92	107.36	35.29	314.26	565.38	20.94
Bryophytllum calycinum	302.31	182.41	19.09	418.49	904.62	9.52
Bryophytllum calycinum	274.62	110.49	22.88	429.96	773.08	7.78
Bryophytllum calycinum	260.77	86.93	19.55	402.13	613.85	7.07
Ruellia tuberosa	717.69	1135.61	7.04	635.3	1107.69	23
Ruellia tuberosa	625.38	1110.6	6.16	659.79	1509.23	27.03
Ruellia tuberosa	616.15	686.89	4.68	774.45	1363.85	20.69
Enhydra fluctuans	415.38	143.32	43.31	602.46	1345.38	21.9
Enhydra fluctuans	313.85	140.71	46.84	550.87	1301.54	20.64
Enhydra fluctuans	346.15	170.94	33.53	542.53	1317.69	23.58
Tridax procumbens	440.77	441.43	16.52	802.07	1433.08	1.02
Tridax procumbens	466.15	488.85	4.77	891.19	1467.69	2.35
Tridax procumbens	362.31	280.91	14.34	959.98	1682.31	6.55

## Sheet: Raw Data_Fig.4A
Raw Figure 4A: Data for the heatmap displays the associations among twenty medicinal weed species based on seven leaf traits.
Plant Species	Chlorophyll a	Chlorophyll b	Total chlorophyll	Carotenoids	Total phenolic	Total flavonoid	IC50 value to scavenge DPPH (mg mL-1)
	(μg g-1 FW)	(μg g-1 FW)	(μg g-1 FW)	(μg g-1 FW)	(mg GAE 100g-1 FW)	(mg CE 100g-1 FW)
Oxalis corniculata	359.58	246.09	605.67	82.07	93.03	636.92	28.8
Oxalis corniculata	397.97	274.18	672.15	114.1	138.75	590.77	10
Oxalis corniculata	320.04	300.9	620.94	53.56	108.67	641.54	64.9
Heliotropium indicum	349.74	288.53	638.28	69.94	1098.03	399.23	0.45
Heliotropium indicum	436.11	75.25	511.36	190.83	744.48	420	3.63
Heliotropium indicum	327.58	210.75	538.33	41.77	615.92	523.85	3.44
Eclipta postrata	240.4	254.31	494.71	26.41	431.44	856.15	18.3
Eclipta postrata	226.58	273.6	500.18	13.49	696.56	837.69	33.63
Eclipta postrata	229.47	273.22	502.69	17.42	698.36	1218.46	37.38
Euphorbia hirta	327.93	180.66	508.59	92.28	2399.62	593.08	1.97
Euphorbia hirta	331.65	204.76	536.41	92.89	959.57	853.85	13.77
Euphorbia hirta	244.25	202.8	447.06	46.8	1807.82	780	18.52
Portulaca oleracea	224.11	274.05	498.16	6.9	106.32	288.46	71.89
Portulaca oleracea	230.69	228.05	458.74	22.24	93.81	606.92	61.63
Portulaca oleracea	195.31	152.76	348.07	30.89	78.17	636.92	79.61
Alternanthera sessilis	319.74	91.78	411.51	124.34	345.08	544.62	32.49
Alternanthera sessilis	302.58	128.21	430.79	101.6	247.92	143.08	32.12
Alternanthera sessilis	277.23	133.98	411.21	88.69	278.73	542.31	36.5
Scoparia dulcis	391.55	298.64	690.19	83.93	538.64	833.08	17.74
Scoparia dulcis	238.41	214.44	452.85	41.19	423.27	1211.54	17.74
Scoparia dulcis	252.38	178.72	431.1	61.24	584.65	1257.69	26.87
Centella verticillata	244.28	239.94	484.22	36.16	629.57	530.77	10.45
Centella verticillata	236.73	211.95	448.68	37.18	821.98	664.62	18.12
Centella verticillata	286.48	213	499.48	63.08	565.66	586.15	9.61
Acalypha indica	322.12	169.88	492	101.58	303.54	948.46	28.25
Acalypha indica	352.9	332.57	685.47	56.79	342.06	726.92	24.81
Acalypha indica	333.26	155.61	488.87	108.77	305.65	627.69	29.76
Synedrella nodiflora	236.94	217.72	454.65	38.49	0	990	39.49
Synedrella nodiflora	255.65	206.34	461.99	52.64	149.62	978.46	40.49
Synedrella nodiflora	255.62	208.77	464.39	48.93	155.83	701.54	39.2
Persicaria lapathifolia	264.45	122.09	386.55	88.85	1023.1	1504.62	11.79
Persicaria lapathifolia	245	142.4	387.4	70.33	1299.26	1737.69	6.19
Persicaria lapathifolia	258.09	134.44	392.54	80.8	1283.62	1569.23	10.99
Ageratum conyzoides	247.61	221.07	468.68	44.85	143.59	969.23	52.01
Ageratum conyzoides	242.42	222.97	465.39	42.04	206.7	1070.77	29.73
Ageratum conyzoides	257.98	112.93	370.91	85.76	104.76	620.77	99.77
Trema orientalis	247.69	165.04	412.73	63.99	217.85	895.38	98.29
Trema orientalis	247.83	164.96	412.78	64.45	212.11	708.46	162.07
Trema orientalis	248.63	164.47	413.1	65.01	230.88	653.08	106.81
Senna occidentalis	264.75	106.12	370.87	99.04	518.04	1601.54	23.63
Senna occidentalis	263.42	106.93	370.35	97.91	493.02	1839.23	30.58
Senna occidentalis	262.61	107.42	370.03	97.54	510.74	1433.08	29.59
Parthenium hysterophorus	223.75	300.97	524.72	4.42	665.53	570	1.53
Parthenium hysterophorus	223.21	301.3	524.51	2.74	642.59	553.85	7.13
Parthenium hysterophorus	223.21	301.3	524.51	3.79	727.54	669.23	5.83
Coccinia grandis	258.21	110.1	368.3	89.97	276.22	660	22.93
Coccinia grandis	258.21	110.1	368.3	91.41	329.9	800.77	19.61
Coccinia grandis	258.47	109.94	368.41	91.87	314.26	565.38	20.94
Bryophytllum calycinum	226.49	267.75	494.23	15.27	418.49	904.62	9.52
Bryophytllum calycinum	224.93	264.08	489.01	15.99	429.96	773.08	7.78
Bryophytllum calycinum	273.97	225	498.97	47.72	402.13	613.85	7.07
Ruellia tuberosa	255.55	135.99	391.54	81.69	635.3	1107.69	23
Ruellia tuberosa	254.62	136.55	391.17	80.81	659.79	1509.23	27.03
Ruellia tuberosa	255.42	136.07	391.49	81.56	774.45	1363.85	20.69
Enhydra fluctuans	239.18	218.76	457.95	43.33	602.46	1345.38	21.9
Enhydra fluctuans	237.45	219.82	457.26	42.14	550.87	1301.54	20.64
Enhydra fluctuans	237.18	219.98	457.16	41.88	542.53	1317.69	23.58
Tridax procumbens	241.3	193.2	434.5	52.67	802.07	1433.08	1.02
Tridax procumbens	242.24	192.63	434.87	53.69	891.19	1467.69	2.35
Tridax procumbens	243.3	191.98	435.29	54.7	959.98	1682.31	6.55

## Sheet: Raw data_Fig. 4B
Raw data for Figure 4B-4H: Data for Bar graph showing comparative cluster analysis in leaf of selected species - chlorophyll a, chlorophyll b, total chlorophyll, carotenoids, phenolics, flavonoids, and DPPH.
Clusters	Plant Species	Chlorophyll a	Chlorophyll b	Total chlorophyll	Carotenoids	Total phenolic	Total flavonoid	IC50 value to scavenge DPPH (mg mL-1)
		(μg g-1 FW)	(μg g-1 FW)	(μg g-1 FW)	(μg g-1 FW)	(mg GAE 100g-1 FW)	(mg CE 100g-1 FW)
Cluster-1	Ruellia tuberosa	255.55	135.99	391.54	81.69	635.3	1107.69	23
Cluster-1	Ruellia tuberosa	254.62	136.55	391.17	80.81	659.79	1509.23	27.03
Cluster-1	Ruellia tuberosa	255.42	136.07	391.49	81.56	774.45	1363.85	20.69
Cluster-1	Enhydra fluctuans	239.18	218.76	457.95	43.33	602.46	1345.38	21.9
Cluster-1	Enhydra fluctuans	237.45	219.82	457.26	42.14	550.87	1301.54	20.64
Cluster-1	Enhydra fluctuans	237.18	219.98	457.16	41.88	542.53	1317.69	23.58
Cluster-1	Senna occidentalis	264.75	106.12	370.87	99.04	518.04	1601.54	23.63
Cluster-1	Senna occidentalis	263.42	106.93	370.35	97.91	493.02	1839.23	30.58
Cluster-1	Senna occidentalis	262.61	107.42	370.03	97.54	510.74	1433.08	29.59
Cluster-1	Scoparia dulcis	391.55	298.64	690.19	83.93	538.64	833.08	17.74
Cluster-1	Scoparia dulcis	238.41	214.44	452.85	41.19	423.27	1211.54	17.74
Cluster-1	Scoparia dulcis	252.38	178.72	431.1	61.24	584.65	1257.69	26.87
Cluster-1	Eclipta postrata	240.4	254.31	494.71	26.41	431.44	856.15	18.3
Cluster-1	Eclipta postrata	226.58	273.6	500.18	13.49	696.56	837.69	33.63
Cluster-1	Eclipta postrata	229.47	273.22	502.69	17.42	698.36	1218.46	37.38
Cluster-1	Persicaria lapathifolia	264.45	122.09	386.55	88.85	1023.1	1504.62	11.79
Cluster-1	Persicaria lapathifolia	245	142.4	387.4	70.33	1299.26	1737.69	6.19
Cluster-1	Persicaria lapathifolia	258.09	134.44	392.54	80.8	1283.62	1569.23	10.99
Cluster-1	Tridax procumbens	241.3	193.2	434.5	52.67	802.07	1433.08	1.02
Cluster-1	Tridax procumbens	242.24	192.63	434.87	53.69	891.19	1467.69	2.35
Cluster-1	Tridax procumbens	243.3	191.98	435.29	54.7	959.98	1682.31	6.55
Cluster-2	Euphorbia hirta	327.93	180.66	508.59	92.28	2399.62	593.08	1.97
Cluster-2	Euphorbia hirta	331.65	204.76	536.41	92.89	959.57	853.85	13.77
Cluster-2	Euphorbia hirta	244.25	202.8	447.06	46.8	1807.82	780	18.52
Cluster-3	Acalypha indica	322.12	169.88	492	101.58	303.54	948.46	28.25
Cluster-3	Acalypha indica	352.9	332.57	685.47	56.79	342.06	726.92	24.81
Cluster-3	Acalypha indica	333.26	155.61	488.87	108.77	305.65	627.69	29.76
Cluster-3	Bryophytllum calycinum	226.49	267.75	494.23	15.27	418.49	904.62	9.52
Cluster-3	Bryophytllum calycinum	224.93	264.08	489.01	15.99	429.96	773.08	7.78
Cluster-3	Bryophytllum calycinum	273.97	225	498.97	47.72	402.13	613.85	7.07
Cluster-3	Trema orientalis	247.69	165.04	412.73	63.99	217.85	895.38	98.29
Cluster-3	Trema orientalis	247.83	164.96	412.78	64.45	212.11	708.46	162.07
Cluster-3	Trema orientalis	248.63	164.47	413.1	65.01	230.88	653.08	106.81
Cluster-3	Coccinia grandis	258.21	110.1	368.3	89.97	276.22	660	22.93
Cluster-3	Coccinia grandis	258.21	110.1	368.3	91.41	329.9	800.77	19.61
Cluster-3	Coccinia grandis	258.47	109.94	368.41	91.87	314.26	565.38	20.94
Cluster-3	Ageratum conyzoides	247.61	221.07	468.68	44.85	143.59	969.23	52.01
Cluster-3	Ageratum conyzoides	242.42	222.97	465.39	42.04	206.7	1070.77	29.73
Cluster-3	Ageratum conyzoides	257.98	112.93	370.91	85.76	104.76	620.77	99.77
Cluster-3	Synedrella nodiflora	236.94	217.72	454.65	38.49	0	990	39.49
Cluster-3	Synedrella nodiflora	255.65	206.34	461.99	52.64	149.62	978.46	40.49
Cluster-3	Synedrella nodiflora	255.62	208.77	464.39	48.93	155.83	701.54	39.2
Cluster-4	Oxalis corniculata	359.58	246.09	605.67	82.07	93.03	636.92	28.8
Cluster-4	Oxalis corniculata	397.97	274.18	672.15	114.1	138.75	590.77	10
Cluster-4	Oxalis corniculata	320.04	300.9	620.94	53.56	108.67	641.54	64.9
Cluster-4	Portulaca oleracea	224.11	274.05	498.16	6.9	106.32	288.46	71.89
Cluster-4	Portulaca oleracea	230.69	228.05	458.74	22.24	93.81	606.92	61.63
Cluster-4	Portulaca oleracea	195.31	152.76	348.07	30.89	78.17	636.92	79.61
Cluster-4	Alternanthera sessilis	319.74	91.78	411.51	124.34	345.08	544.62	32.49
Cluster-4	Alternanthera sessilis	302.58	128.21	430.79	101.6	247.92	143.08	32.12
Cluster-4	Alternanthera sessilis	277.23	133.98	411.21	88.69	278.73	542.31	36.5
Cluster-5	Parthenium hysterophorus	223.75	300.97	524.72	4.42	665.53	570	1.53
Cluster-5	Parthenium hysterophorus	223.21	301.3	524.51	2.74	642.59	553.85	7.13
Cluster-5	Parthenium hysterophorus	223.21	301.3	524.51	3.79	727.54	669.23	5.83
Cluster-5	Centella verticillata	244.28	239.94	484.22	36.16	629.57	530.77	10.45
Cluster-5	Centella verticillata	236.73	211.95	448.68	37.18	821.98	664.62	18.12
Cluster-5	Centella verticillata	286.48	213	499.48	63.08	565.66	586.15	9.61
Cluster-5	Heliotropium indicum	349.74	288.53	638.28	69.94	1098.03	399.23	0.45
Cluster-5	Heliotropium indicum	436.11	75.25	511.36	190.83	744.48	420	3.63
Cluster-5	Heliotropium indicum	327.58	210.75	538.33	41.77	615.92	523.85	3.44

## Sheet: Raw data_Figure 5A
Raw data for Figure 5A: Data for the heatmap displays the associations among twenty medicinal weed species based on seven stem traits.
Plant Species	Chlorophyll a	Chlorophyll b	Total chlorophyll	Carotenoids	Total phenolic	Total flavonoid	IC50 value to scavenge DPPH (mg mL-1)
	(μg g-1 FW)	(μg g-1 FW)	(μg g-1 FW)	(μg g-1 FW)	(mg GAE 100g-1 FW)	(mg CE 100g-1 FW)
Oxalis corniculata	181.31	166.54	347.86	28.02	399.23	153.22	34.84
Oxalis corniculata	140.47	126.69	267.16	25.75	420	344.8	26.31
Oxalis corniculata	142.11	126.28	268.39	14.21	523.85	158.45	38.85
Heliotropium indicum	153.52	111.67	265.19	28.03	346.15	158.5	13.98
Heliotropium indicum	140.3	80.4	220.7	30.27	302.31	127.12	10.03
Heliotropium indicum	160.67	82.02	242.69	38.91	350.77	324.88	12.01
Eclipta postrata	110.81	74.66	185.47	28.35	143.08	145.07	33.34
Eclipta postrata	88.49	59.1	147.59	21.81	117.69	102.85	55.06
Eclipta postrata	71.33	60.87	132.2	7.67	87.69	60.04	48.13
Euphorbia hirta	132.38	97.73	230.1	24.21	242.31	655.99	16.14
Euphorbia hirta	119.75	90.21	209.96	23.7	163.85	365.71	16.39
Euphorbia hirta	121.12	87.62	208.74	58.26	180	350.91	23.67
Portulaca oleracea	105.13	64.28	169.41	26.13	62.31	132.38	42.39
Portulaca oleracea	102.17	63.65	165.82	26.46	9.23	102.15	45.89
Portulaca oleracea	121.98	73.94	195.92	31.4	228.46	39.98	48.15
Alternanthera sessilis	157.15	113.01	270.17	30.59	117.69	53.61	118.69
Alternanthera sessilis	142.73	93.62	236.35	31.86	60	61.98	135.3
Alternanthera sessilis	137.21	78.27	215.48	33.35	62.31	29.97	103.04
Scoparia dulcis	330.16	186.18	516.34	62.49	94.62	166.84	37.25
Scoparia dulcis	281.66	164.93	446.6	57.02	226.15	202.12	39.48
Scoparia dulcis	335.84	190.87	526.71	70.62	180	158.9	38.18
Centella verticillata	104.27	98.78	203.06	6.39	177.69	126.64	40.2
Centella verticillata	122.25	95.63	217.88	15.82	143.08	134.45	40.93
Centella verticillata	101.36	79.19	180.55	14.61	96.92	142.84	38.04
Acalypha indica	176.58	99.43	276.01	105.34	336.92	134.76	36.71
Acalypha indica	189.3	119.77	309.07	43.1	353.08	102.76	33.64
Acalypha indica	173.97	111.21	285.18	39.56	258.46	116.62	35.75
Synedrella nodiflora	78.68	57.95	136.63	19	219.23	80.76	89.29
Synedrella nodiflora	109.88	65.87	175.74	27.66	212.31	92.67	130.7
Synedrella nodiflora	117.87	87.4	205.27	28.14	246.92	90.16	90.78
Persicaria lapathifolia	83.43	47.13	130.55	19.01	350.77	262.1	26.05
Persicaria lapathifolia	88.33	49.97	138.3	20.4	440.77	288.72	22.97
Persicaria lapathifolia	69.84	39.86	109.7	16.9	436.15	220.97	23.55
Ageratum conyzoides	254.43	116.92	371.35	79.05	396.92	82.96	42.28
Ageratum conyzoides	255.38	87.54	342.92	85.71	295.38	94.87	56.79
Ageratum conyzoides	265.51	142.07	407.58	76.63	459.23	91.07	46.47
Trema orientalis	129.18	67.14	196.32	30.49	274.62	80.26	112.38
Trema orientalis	131.13	56.85	187.98	34.91	286.15	80.26	70.71
Trema orientalis	128.73	77.03	205.76	25.7	244.62	74.01	183.93
Senna occidentalis	107.84	93.71	201.54	41.98	623.08	239.21	43.71
Senna occidentalis	92.67	70.16	162.82	45.29	553.85	199.08	50.91
Senna occidentalis	111.62	85.58	197.2	51.67	669.23	223.58	42.77
Parthenium hysterophorus	73.5	42.72	116.22	13.13	410.77	255.89	10.72
Parthenium hysterophorus	76.36	45.11	121.47	12.89	373.85	248.59	7.49
Parthenium hysterophorus	79.62	47.26	126.87	15.25	429.23	341.88	8.48
Coccinia grandis	209.07	144.82	353.89	54.64	212.31	128.21	30.19
Coccinia grandis	202.33	159.84	362.17	46.45	327.69	92.77	31.57
Coccinia grandis	205.63	168.03	373.66	45.26	246.92	107.36	35.29
Bryophytllum calycinum	48.68	33.29	81.97	11.28	302.31	182.41	19.09
Bryophytllum calycinum	48.85	30.51	79.36	11.38	274.62	110.49	22.88
Bryophytllum calycinum	58.41	38.49	96.9	13.01	260.77	86.93	19.55
Ruellia tuberosa	81.99	83.44	165.43	14.31	717.69	1135.61	7.04
Ruellia tuberosa	85.66	77.81	163.47	14.75	625.38	1110.6	6.16
Ruellia tuberosa	76.65	82.32	158.97	9.58	616.15	686.89	4.68
Enhydra fluctuans	55.57	28.13	83.7	12.09	415.38	143.32	43.31
Enhydra fluctuans	58.61	30.16	88.78	12.25	313.85	140.71	46.84
Enhydra fluctuans	80.58	42.79	123.37	14.7	346.15	170.94	33.53
Tridax procumbens	66.4	45	111.4	11.84	440.77	441.43	16.52
Tridax procumbens	68.82	37.5	113.17	15.56	466.15	488.85	4.77
Tridax procumbens	68.82	44.35	113.17	11.84	362.31	280.91	14.34

## Sheet: Raw data_Fig. 5B
Raw data for Figure 5B-5H: Data for Bar graph showing comparative cluster analysis in stem of selected species - chlorophyll a, chlorophyll b, total chlorophyll, carotenoids, phenolics, flavonoids, and DPPH.
Clusters	Plant Species	Chlorophyll a	Chlorophyll b	Total chlorophyll	Carotenoids	Total phenolic	Total flavonoid	IC50 value to scavenge DPPH (mg mL-1)
		(μg g-1 FW)	(μg g-1 FW)	(μg g-1 FW)	(μg g-1 FW)	(mg GAE 100g-1 FW)	(mg CE 100g-1 FW)
Cluster-1	Oxalis corniculata	181.314	166.542	347.856	28.0245	93.0276	636.923	34.8435
Cluster-1	Oxalis corniculata	140.474	126.685	267.159	25.7451	138.747	590.769	26.3064
Cluster-1	Oxalis corniculata	142.11	126.282	268.392	14.2127	108.673	641.538	38.8489
Cluster-1	Heliotropium indicum	153.525	111.666	265.191	28.0347	1098.03	399.231	13.9757
Cluster-1	Heliotropium indicum	140.296	80.3993	220.695	30.2731	744.484	420	10.0273
Cluster-1	Heliotropium indicum	160.669	82.0194	242.688	38.9114	615.92	523.846	12.0123
Cluster-1	Acalypha indica	176.577	99.4335	276.01	105.344	303.539	948.462	36.7117
Cluster-1	Acalypha indica	189.299	119.769	309.068	43.1039	342.059	726.923	33.6413
Cluster-1	Acalypha indica	173.974	111.205	285.179	39.5622	305.649	627.692	35.7489
Cluster-1	Ageratum conyzoides	254.43	116.919	371.349	79.0485	143.586	969.231	42.2809
Cluster-1	Ageratum conyzoides	255.38	87.54	342.92	85.706	206.699	1070.77	56.7891
Cluster-1	Ageratum conyzoides	265.507	142.074	407.581	76.6278	104.759	620.769	46.4745
Cluster-1	Coccinia grandis	209.072	144.816	353.888	54.638	276.216	660	30.1878
Cluster-1	Coccinia grandis	202.328	159.839	362.167	46.4451	329.896	800.769	31.5687
Cluster-1	Coccinia grandis	205.625	168.03	373.656	45.2649	314.261	565.385	35.2904
Cluster-2	Scoparia dulcis	330.162	186.176	516.338	62.4876	538.641	833.077	37.2549
Cluster-2	Scoparia dulcis	281.665	164.932	446.597	57.0175	423.274	1211.54	39.4752
Cluster-2	Scoparia dulcis	335.838	190.867	526.705	70.6157	584.653	1257.69	38.1846
Cluster-3	Eclipta postrata	110.809	74.6642	185.473	28.3545	431.437	856.154	33.3353
Cluster-3	Eclipta postrata	88.4913	59.0979	147.589	21.8088	696.558	837.692	55.0593
Cluster-3	Eclipta postrata	71.3323	60.8675	132.2	7.66841	698.359	1218.46	48.1273
Cluster-3	Portulaca oleracea	105.128	64.28	169.408	26.1332	106.317	288.462	42.3865
Cluster-3	Portulaca oleracea	102.173	63.6482	165.822	26.4584	93.8094	606.923	45.891
Cluster-3	Portulaca oleracea	121.981	73.943	195.924	31.4009	78.1745	636.923	48.1538
Cluster-3	Alternanthera sessilis	157.154	113.012	270.166	30.5939	345.084	544.615	118.689
Cluster-3	Alternanthera sessilis	142.733	93.6165	236.35	31.8572	247.925	143.077	135.304
Cluster-3	Alternanthera sessilis	137.209	78.2657	215.475	33.3471	278.731	542.308	103.039
Cluster-3	Centella verticillata	104.275	98.7844	203.059	6.388	629.565	530.769	40.1967
Cluster-3	Centella verticillata	122.253	95.6256	217.879	15.8151	821.978	664.615	40.9256
Cluster-3	Centella verticillata	101.36	79.1932	180.554	14.6119	565.661	586.154	38.0382
Cluster-3	Synedrella nodiflora	78.677	57.9536	136.631	19.0024	0	990	89.2904
Cluster-3	Synedrella nodiflora	109.876	65.8682	175.744	27.6584	149.619	978.462	130.702
Cluster-3	Synedrella nodiflora	117.87	87.4037	205.274	28.1394	155.828	701.538	90.7831
Cluster-3	Trema orientalis	129.18	67.14	196.32	30.486	217.846	895.385	112.385
Cluster-3	Trema orientalis	131.126	56.8537	187.98	34.9121	212.113	708.462	70.7079
Cluster-3	Trema orientalis	128.728	77.0279	205.756	25.6996	230.875	653.077	183.926
Cluster-3	Bryophytllum calycinum	48.6819	33.2857	81.9676	11.279	418.494	904.615	19.0892
Cluster-3	Bryophytllum calycinum	48.852	30.512	79.364	11.3766	429.96	773.077	22.8824
Cluster-3	Bryophytllum calycinum	58.409	38.4919	96.901	13.0068	402.13	613.846	19.5481
Cluster-3	Enhydra fluctuans	55.5695	28.1285	83.698	12.0867	602.465	1345.38	43.3058
Cluster-3	Enhydra fluctuans	58.6135	30.1625	88.776	12.254	550.869	1301.54	46.8388
Cluster-3	Enhydra fluctuans	80.5818	42.7854	123.367	14.6994	542.531	1317.69	33.533
Cluster-4	Euphorbia hirta	132.379	97.725	230.104	24.2057	2399.62	593.077	16.1423
Cluster-4	Euphorbia hirta	119.747	90.2129	209.96	23.7008	959.567	853.846	16.3862
Cluster-4	Euphorbia hirta	121.123	87.62	208.743	58.2619	1807.82	780	23.6669
Cluster-5	Persicaria lapathifolia	83.4259	47.1257	130.552	19.0071	1023.1	1504.62	26.0471
Cluster-5	Persicaria lapathifolia	88.3259	49.9737	138.3	20.4022	1299.26	1737.69	22.9736
Cluster-5	Persicaria lapathifolia	69.8386	39.8575	109.696	16.9033	1283.62	1569.23	23.5518
Cluster-5	Senna occidentalis	107.837	93.7064	201.543	41.9795	518.036	1601.54	43.7079
Cluster-5	Senna occidentalis	92.6657	70.1551	162.821	45.2875	493.02	1839.23	50.9096
Cluster-5	Senna occidentalis	111.621	85.5804	197.201	51.6701	510.74	1433.08	42.7695
Cluster-5	Parthenium hysterophorus	73.5	42.72	116.22	13.1273	665.525	570	10.7154
Cluster-5	Parthenium hysterophorus	76.3585	45.1095	121.468	12.8912	642.594	553.846	7.48838
Cluster-5	Parthenium hysterophorus	79.6178	47.2554	126.873	15.253	727.544	669.231	8.47868
Cluster-5	Tridax procumbens	66.4009	44.9956	111.397	11.8399	802.07	1433.08	16.5193
Cluster-5	Tridax procumbens	68.8163	37.4963	113.169	15.5607	891.189	1467.69	4.7672
Cluster-5	Tridax procumbens	68.8163	44.3529	113.169	11.838	959.982	1682.31	14.3389
Cluster-6	Ruellia tuberosa	81.9941	83.4383	165.432	14.3093	635.298	1107.69	7.03969
Cluster-6	Ruellia tuberosa	85.6599	77.8117	163.472	14.747	659.793	1509.23	6.1596
Cluster-6	Ruellia tuberosa	76.6491	82.3173	158.966	9.576	774.448	1363.85	4.67597

## Sheet: Raw data_Fig. 6
Raw data for Figure 6: Data for Scatterplot, correlation matrix and distribution of data chlorophyll a, chlorophyll b, total chlorophyll, carotenoids, phenolics, flavonoids, DPPH of the studied 20 medicinal weed species
Plant Species	Stem							Leaf
	Chlorophyll a	Chlorophyll b	Total chlorophyll	Carotenoids	Total phenolic	Total flavonoid	IC50 value to scavenge DPPH (mg mL-1)	Chlorophyll a	Chlorophyll b	Total chlorophyll	Carotenoids	Total phenolic	Total flavonoid	IC50 value to scavenge DPPH (mg mL-1)
	(μg g-1 FW)	(μg g-1 FW)	(μg g-1 FW)	(μg g-1 FW)	(mg GAE 100g-1 FW)	(mg CE 100g-1 FW)		(μg g-1 FW)	(μg g-1 FW)	(μg g-1 FW)	(μg g-1 FW)	(mg GAE 100g-1 FW)	(mg CE 100g-1 FW)
Oxalis corniculata	181.31	166.54	347.86	28.02	399.23	153.22	34.84	359.58	246.09	605.67	82.07	93.03	636.92	28.8
Oxalis corniculata	140.47	126.69	267.16	25.75	420	344.8	26.31	397.97	274.18	672.15	114.1	138.75	590.77	10
Oxalis corniculata	142.11	126.28	268.39	14.21	523.85	158.45	38.85	320.04	300.9	620.94	53.56	108.67	641.54	64.9
Heliotropium indicum	153.52	111.67	265.19	28.03	346.15	158.5	13.98	349.74	288.53	638.28	69.94	1098.03	399.23	0.45
Heliotropium indicum	140.3	80.4	220.7	30.27	302.31	127.12	10.03	436.11	75.25	511.36	190.83	744.48	420	3.63
Heliotropium indicum	160.67	82.02	242.69	38.91	350.77	324.88	12.01	327.58	210.75	538.33	41.77	615.92	523.85	3.44
Eclipta postrata	110.81	74.66	185.47	28.35	143.08	145.07	33.34	240.4	254.31	494.71	26.41	431.44	856.15	18.3
Eclipta postrata	88.49	59.1	147.59	21.81	117.69	102.85	55.06	226.58	273.6	500.18	13.49	696.56	837.69	33.63
Eclipta postrata	71.33	60.87	132.2	7.67	87.69	60.04	48.13	229.47	273.22	502.69	17.42	698.36	1218.46	37.38
Euphorbia hirta	132.38	97.73	230.1	24.21	242.31	655.99	16.14	327.93	180.66	508.59	92.28	2399.62	593.08	1.97
Euphorbia hirta	119.75	90.21	209.96	23.7	163.85	365.71	16.39	331.65	204.76	536.41	92.89	959.57	853.85	13.77
Euphorbia hirta	121.12	87.62	208.74	58.26	180	350.91	23.67	244.25	202.8	447.06	46.8	1807.82	780	18.52
Portulaca oleracea	105.13	64.28	169.41	26.13	62.31	132.38	42.39	224.11	274.05	498.16	6.9	106.32	288.46	71.89
Portulaca oleracea	102.17	63.65	165.82	26.46	9.23	102.15	45.89	230.69	228.05	458.74	22.24	93.81	606.92	61.63
Portulaca oleracea	121.98	73.94	195.92	31.4	228.46	39.98	48.15	195.31	152.76	348.07	30.89	78.17	636.92	79.61
Alternanthera sessilis	157.15	113.01	270.17	30.59	117.69	53.61	118.69	319.74	91.78	411.51	124.34	345.08	544.62	32.49
Alternanthera sessilis	142.73	93.62	236.35	31.86	60	61.98	135.3	302.58	128.21	430.79	101.6	247.92	143.08	32.12
Alternanthera sessilis	137.21	78.27	215.48	33.35	62.31	29.97	103.04	277.23	133.98	411.21	88.69	278.73	542.31	36.5
Scoparia dulcis	330.16	186.18	516.34	62.49	94.62	166.84	37.25	391.55	298.64	690.19	83.93	538.64	833.08	17.74
Scoparia dulcis	281.66	164.93	446.6	57.02	226.15	202.12	39.48	238.41	214.44	452.85	41.19	423.27	1211.54	17.74
Scoparia dulcis	335.84	190.87	526.71	70.62	180	158.9	38.18	252.38	178.72	431.1	61.24	584.65	1257.69	26.87
Centella verticillata	104.27	98.78	203.06	6.39	177.69	126.64	40.2	244.28	239.94	484.22	36.16	629.57	530.77	10.45
Centella verticillata	122.25	95.63	217.88	15.82	143.08	134.45	40.93	236.73	211.95	448.68	37.18	821.98	664.62	18.12
Centella verticillata	101.36	79.19	180.55	14.61	96.92	142.84	38.04	286.48	213	499.48	63.08	565.66	586.15	9.61
Acalypha indica	176.58	99.43	276.01	105.34	336.92	134.76	36.71	322.12	169.88	492	101.58	303.54	948.46	28.25
Acalypha indica	189.3	119.77	309.07	43.1	353.08	102.76	33.64	352.9	332.57	685.47	56.79	342.06	726.92	24.81
Acalypha indica	173.97	111.21	285.18	39.56	258.46	116.62	35.75	333.26	155.61	488.87	108.77	305.65	627.69	29.76
Synedrella nodiflora	78.68	57.95	136.63	19	219.23	80.76	89.29	236.94	217.72	454.65	38.49	0	990	39.49
Synedrella nodiflora	109.88	65.87	175.74	27.66	212.31	92.67	130.7	255.65	206.34	461.99	52.64	149.62	978.46	40.49
Synedrella nodiflora	117.87	87.4	205.27	28.14	246.92	90.16	90.78	255.62	208.77	464.39	48.93	155.83	701.54	39.2
Persicaria lapathifolia	83.43	47.13	130.55	19.01	350.77	262.1	26.05	264.45	122.09	386.55	88.85	1023.1	1504.62	11.79
Persicaria lapathifolia	88.33	49.97	138.3	20.4	440.77	288.72	22.97	245	142.4	387.4	70.33	1299.26	1737.69	6.19
Persicaria lapathifolia	69.84	39.86	109.7	16.9	436.15	220.97	23.55	258.09	134.44	392.54	80.8	1283.62	1569.23	10.99
Ageratum conyzoides	254.43	116.92	371.35	79.05	396.92	82.96	42.28	247.61	221.07	468.68	44.85	143.59	969.23	52.01
Ageratum conyzoides	255.38	87.54	342.92	85.71	295.38	94.87	56.79	242.42	222.97	465.39	42.04	206.7	1070.77	29.73
Ageratum conyzoides	265.51	142.07	407.58	76.63	459.23	91.07	46.47	257.98	112.93	370.91	85.76	104.76	620.77	99.77
Trema orientalis	129.18	67.14	196.32	30.49	274.62	80.26	112.38	247.69	165.04	412.73	63.99	217.85	895.38	98.29
Trema orientalis	131.13	56.85	187.98	34.91	286.15	80.26	70.71	247.83	164.96	412.78	64.45	212.11	708.46	162.07
Trema orientalis	128.73	77.03	205.76	25.7	244.62	74.01	183.93	248.63	164.47	413.1	65.01	230.88	653.08	106.81
Senna occidentalis	107.84	93.71	201.54	41.98	623.08	239.21	43.71	264.75	106.12	370.87	99.04	518.04	1601.54	23.63
Senna occidentalis	92.67	70.16	162.82	45.29	553.85	199.08	50.91	263.42	106.93	370.35	97.91	493.02	1839.23	30.58
Senna occidentalis	111.62	85.58	197.2	51.67	669.23	223.58	42.77	262.61	107.42	370.03	97.54	510.74	1433.08	29.59
Parthenium hysterophorus	73.5	42.72	116.22	13.13	410.77	255.89	10.72	223.75	300.97	524.72	4.42	665.53	570	1.53
Parthenium hysterophorus	76.36	45.11	121.47	12.89	373.85	248.59	7.49	223.21	301.3	524.51	2.74	642.59	553.85	7.13
Parthenium hysterophorus	79.62	47.26	126.87	15.25	429.23	341.88	8.48	223.21	301.3	524.51	3.79	727.54	669.23	5.83
Coccinia grandis	209.07	144.82	353.89	54.64	212.31	128.21	30.19	258.21	110.1	368.3	89.97	276.22	660	22.93
Coccinia grandis	202.33	159.84	362.17	46.45	327.69	92.77	31.57	258.21	110.1	368.3	91.41	329.9	800.77	19.61
Coccinia grandis	205.63	168.03	373.66	45.26	246.92	107.36	35.29	258.47	109.94	368.41	91.87	314.26	565.38	20.94
Bryophytllum calycinum	48.68	33.29	81.97	11.28	302.31	182.41	19.09	226.49	267.75	494.23	15.27	418.49	904.62	9.52
Bryophytllum calycinum	48.85	30.51	79.36	11.38	274.62	110.49	22.88	224.93	264.08	489.01	15.99	429.96	773.08	7.78
Bryophytllum calycinum	58.41	38.49	96.9	13.01	260.77	86.93	19.55	273.97	225	498.97	47.72	402.13	613.85	7.07
Ruellia tuberosa	81.99	83.44	165.43	14.31	717.69	1135.61	7.04	255.55	135.99	391.54	81.69	635.3	1107.69	23
Ruellia tuberosa	85.66	77.81	163.47	14.75	625.38	1110.6	6.16	254.62	136.55	391.17	80.81	659.79	1509.23	27.03
Ruellia tuberosa	76.65	82.32	158.97	9.58	616.15	686.89	4.68	255.42	136.07	391.49	81.56	774.45	1363.85	20.69
Enhydra fluctuans	55.57	28.13	83.7	12.09	415.38	143.32	43.31	239.18	218.76	457.95	43.33	602.46	1345.38	21.9
Enhydra fluctuans	58.61	30.16	88.78	12.25	313.85	140.71	46.84	237.45	219.82	457.26	42.14	550.87	1301.54	20.64
Enhydra fluctuans	80.58	42.79	123.37	14.7	346.15	170.94	33.53	237.18	219.98	457.16	41.88	542.53	1317.69	23.58
Tridax procumbens	66.4	45	111.4	11.84	440.77	441.43	16.52	241.3	193.2	434.5	52.67	802.07	1433.08	1.02
Tridax procumbens	68.82	37.5	113.17	15.56	466.15	488.85	4.77	242.24	192.63	434.87	53.69	891.19	1467.69	2.35
Tridax procumbens	68.82	44.35	113.17	11.84	362.31	280.91	14.34	243.3	191.98	435.29	54.7	959.98	1682.31	6.55

## Sheet: Raw data_Fig. 7
Raw data for Figure 7: Data for Principle Component Analysis (PCA) of chlorophyll a, chlorophyll-b, total chlorophyll, carotenoids, phenolics, flavonoids, DPPH of the studied 20 medicinal weed species.
Plant Species	Stem							Leaf
	Chlorophyll a	Chlorophyll b	Total chlorophyll	Carotenoids	Total phenolic	Total flavonoid	IC50 value to scavenge DPPH (mg mL-1)	Chlorophyll a	Chlorophyll b	Total chlorophyll	Carotenoids	Total phenolic	Total flavonoid	IC50 value to scavenge DPPH (mg mL-1)
	(μg g-1 FW)	(μg g-1 FW)	(μg g-1 FW)	(μg g-1 FW)	(mg GAE 100g-1 FW)	(mg CE 100g-1 FW)		(μg g-1 FW)	(μg g-1 FW)	(μg g-1 FW)	(μg g-1 FW)	(mg GAE 100g-1 FW)	(mg CE 100g-1 FW)
Oxalis corniculata	181.31	166.54	347.86	28.02	399.23	153.22	34.84	359.58	246.09	605.67	82.07	93.03	636.92	28.8
Oxalis corniculata	140.47	126.69	267.16	25.75	420	344.8	26.31	397.97	274.18	672.15	114.1	138.75	590.77	10
Oxalis corniculata	142.11	126.28	268.39	14.21	523.85	158.45	38.85	320.04	300.9	620.94	53.56	108.67	641.54	64.9
Heliotropium indicum	153.52	111.67	265.19	28.03	346.15	158.5	13.98	349.74	288.53	638.28	69.94	1098.03	399.23	0.45
Heliotropium indicum	140.3	80.4	220.7	30.27	302.31	127.12	10.03	436.11	75.25	511.36	190.83	744.48	420	3.63
Heliotropium indicum	160.67	82.02	242.69	38.91	350.77	324.88	12.01	327.58	210.75	538.33	41.77	615.92	523.85	3.44
Eclipta postrata	110.81	74.66	185.47	28.35	143.08	145.07	33.34	240.4	254.31	494.71	26.41	431.44	856.15	18.3
Eclipta postrata	88.49	59.1	147.59	21.81	117.69	102.85	55.06	226.58	273.6	500.18	13.49	696.56	837.69	33.63
Eclipta postrata	71.33	60.87	132.2	7.67	87.69	60.04	48.13	229.47	273.22	502.69	17.42	698.36	1218.46	37.38
Euphorbia hirta	132.38	97.73	230.1	24.21	242.31	655.99	16.14	327.93	180.66	508.59	92.28	2399.62	593.08	1.97
Euphorbia hirta	119.75	90.21	209.96	23.7	163.85	365.71	16.39	331.65	204.76	536.41	92.89	959.57	853.85	13.77
Euphorbia hirta	121.12	87.62	208.74	58.26	180	350.91	23.67	244.25	202.8	447.06	46.8	1807.82	780	18.52
Portulaca oleracea	105.13	64.28	169.41	26.13	62.31	132.38	42.39	224.11	274.05	498.16	6.9	106.32	288.46	71.89
Portulaca oleracea	102.17	63.65	165.82	26.46	9.23	102.15	45.89	230.69	228.05	458.74	22.24	93.81	606.92	61.63
Portulaca oleracea	121.98	73.94	195.92	31.4	228.46	39.98	48.15	195.31	152.76	348.07	30.89	78.17	636.92	79.61
Alternanthera sessilis	157.15	113.01	270.17	30.59	117.69	53.61	118.69	319.74	91.78	411.51	124.34	345.08	544.62	32.49
Alternanthera sessilis	142.73	93.62	236.35	31.86	60	61.98	135.3	302.58	128.21	430.79	101.6	247.92	143.08	32.12
Alternanthera sessilis	137.21	78.27	215.48	33.35	62.31	29.97	103.04	277.23	133.98	411.21	88.69	278.73	542.31	36.5
Scoparia dulcis	330.16	186.18	516.34	62.49	94.62	166.84	37.25	391.55	298.64	690.19	83.93	538.64	833.08	17.74
Scoparia dulcis	281.66	164.93	446.6	57.02	226.15	202.12	39.48	238.41	214.44	452.85	41.19	423.27	1211.54	17.74
Scoparia dulcis	335.84	190.87	526.71	70.62	180	158.9	38.18	252.38	178.72	431.1	61.24	584.65	1257.69	26.87
Centella verticillata	104.27	98.78	203.06	6.39	177.69	126.64	40.2	244.28	239.94	484.22	36.16	629.57	530.77	10.45
Centella verticillata	122.25	95.63	217.88	15.82	143.08	134.45	40.93	236.73	211.95	448.68	37.18	821.98	664.62	18.12
Centella verticillata	101.36	79.19	180.55	14.61	96.92	142.84	38.04	286.48	213	499.48	63.08	565.66	586.15	9.61
Acalypha indica	176.58	99.43	276.01	105.34	336.92	134.76	36.71	322.12	169.88	492	101.58	303.54	948.46	28.25
Acalypha indica	189.3	119.77	309.07	43.1	353.08	102.76	33.64	352.9	332.57	685.47	56.79	342.06	726.92	24.81
Acalypha indica	173.97	111.21	285.18	39.56	258.46	116.62	35.75	333.26	155.61	488.87	108.77	305.65	627.69	29.76
Synedrella nodiflora	78.68	57.95	136.63	19	219.23	80.76	89.29	236.94	217.72	454.65	38.49	0	990	39.49
Synedrella nodiflora	109.88	65.87	175.74	27.66	212.31	92.67	130.7	255.65	206.34	461.99	52.64	149.62	978.46	40.49
Synedrella nodiflora	117.87	87.4	205.27	28.14	246.92	90.16	90.78	255.62	208.77	464.39	48.93	155.83	701.54	39.2
Persicaria lapathifolia	83.43	47.13	130.55	19.01	350.77	262.1	26.05	264.45	122.09	386.55	88.85	1023.1	1504.62	11.79
Persicaria lapathifolia	88.33	49.97	138.3	20.4	440.77	288.72	22.97	245	142.4	387.4	70.33	1299.26	1737.69	6.19
Persicaria lapathifolia	69.84	39.86	109.7	16.9	436.15	220.97	23.55	258.09	134.44	392.54	80.8	1283.62	1569.23	10.99
Ageratum conyzoides	254.43	116.92	371.35	79.05	396.92	82.96	42.28	247.61	221.07	468.68	44.85	143.59	969.23	52.01
Ageratum conyzoides	255.38	87.54	342.92	85.71	295.38	94.87	56.79	242.42	222.97	465.39	42.04	206.7	1070.77	29.73
Ageratum conyzoides	265.51	142.07	407.58	76.63	459.23	91.07	46.47	257.98	112.93	370.91	85.76	104.76	620.77	99.77
Trema orientalis	129.18	67.14	196.32	30.49	274.62	80.26	112.38	247.69	165.04	412.73	63.99	217.85	895.38	98.29
Trema orientalis	131.13	56.85	187.98	34.91	286.15	80.26	70.71	247.83	164.96	412.78	64.45	212.11	708.46	162.07
Trema orientalis	128.73	77.03	205.76	25.7	244.62	74.01	183.93	248.63	164.47	413.1	65.01	230.88	653.08	106.81
Senna occidentalis	107.84	93.71	201.54	41.98	623.08	239.21	43.71	264.75	106.12	370.87	99.04	518.04	1601.54	23.63
Senna occidentalis	92.67	70.16	162.82	45.29	553.85	199.08	50.91	263.42	106.93	370.35	97.91	493.02	1839.23	30.58
Senna occidentalis	111.62	85.58	197.2	51.67	669.23	223.58	42.77	262.61	107.42	370.03	97.54	510.74	1433.08	29.59
Parthenium hysterophorus	73.5	42.72	116.22	13.13	410.77	255.89	10.72	223.75	300.97	524.72	4.42	665.53	570	1.53
Parthenium hysterophorus	76.36	45.11	121.47	12.89	373.85	248.59	7.49	223.21	301.3	524.51	2.74	642.59	553.85	7.13
Parthenium hysterophorus	79.62	47.26	126.87	15.25	429.23	341.88	8.48	223.21	301.3	524.51	3.79	727.54	669.23	5.83
Coccinia grandis	209.07	144.82	353.89	54.64	212.31	128.21	30.19	258.21	110.1	368.3	89.97	276.22	660	22.93
Coccinia grandis	202.33	159.84	362.17	46.45	327.69	92.77	31.57	258.21	110.1	368.3	91.41	329.9	800.77	19.61
Coccinia grandis	205.63	168.03	373.66	45.26	246.92	107.36	35.29	258.47	109.94	368.41	91.87	314.26	565.38	20.94
Bryophytllum calycinum	48.68	33.29	81.97	11.28	302.31	182.41	19.09	226.49	267.75	494.23	15.27	418.49	904.62	9.52
Bryophytllum calycinum	48.85	30.51	79.36	11.38	274.62	110.49	22.88	224.93	264.08	489.01	15.99	429.96	773.08	7.78
Bryophytllum calycinum	58.41	38.49	96.9	13.01	260.77	86.93	19.55	273.97	225	498.97	47.72	402.13	613.85	7.07
Ruellia tuberosa	81.99	83.44	165.43	14.31	717.69	1135.61	7.04	255.55	135.99	391.54	81.69	635.3	1107.69	23
Ruellia tuberosa	85.66	77.81	163.47	14.75	625.38	1110.6	6.16	254.62	136.55	391.17	80.81	659.79	1509.23	27.03
Ruellia tuberosa	76.65	82.32	158.97	9.58	616.15	686.89	4.68	255.42	136.07	391.49	81.56	774.45	1363.85	20.69
Enhydra fluctuans	55.57	28.13	83.7	12.09	415.38	143.32	43.31	239.18	218.76	457.95	43.33	602.46	1345.38	21.9
Enhydra fluctuans	58.61	30.16	88.78	12.25	313.85	140.71	46.84	237.45	219.82	457.26	42.14	550.87	1301.54	20.64
Enhydra fluctuans	80.58	42.79	123.37	14.7	346.15	170.94	33.53	237.18	219.98	457.16	41.88	542.53	1317.69	23.58
Tridax procumbens	66.4	45	111.4	11.84	440.77	441.43	16.52	241.3	193.2	434.5	52.67	802.07	1433.08	1.02
Tridax procumbens	68.82	37.5	113.17	15.56	466.15	488.85	4.77	242.24	192.63	434.87	53.69	891.19	1467.69	2.35
Tridax procumbens	68.82	44.35	113.17	11.84	362.31	280.91	14.34	243.3	191.98	435.29	54.7	959.98	1682.31	6.55

## Sheet: Raw data_Table 1
Raw data for Table 1: Data for Effect of plant species and plant parts on several pigments, phytochemical properties and free radical scavenging potential in 20 medicinal weeds.
Plant Species	Chlorophyll a	Chlorophyll b	Total chlorophyll	Carotenoids	Total phenolic	Total flavonoid
	(μg g-1 FW)	(μg g-1 FW)	(μg g-1 FW)	(μg g-1 FW)	(mg GAE 100g-1 FW)	(mg CE 100g-1 FW)
Oxalis corniculata	540.89	412.63	953.53	110.09	492.26	790.14
Oxalis corniculata	538.44	400.87	939.31	139.85	558.75	935.57
Oxalis corniculata	462.15	427.18	889.33	67.77	632.52	799.99
Heliotropium indicum	503.26	400.2	903.47	97.97	1444.18	557.73
Heliotropium indicum	576.41	155.65	732.06	221.1	1046.79	547.12
Heliotropium indicum	488.25	292.77	781.02	80.68	966.69	848.73
Eclipta postrata	351.21	328.97	680.18	54.76	574.52	1001.22
Eclipta postrata	315.07	332.7	647.77	35.3	814.25	940.54
Eclipta postrata	300.8	334.09	634.89	25.09	786.05	1278.5
Euphorbia hirta	460.31	278.39	738.69	116.49	2641.93	1249.07
Euphorbia hirta	451.4	294.97	746.37	116.59	1123.42	1219.56
Euphorbia hirta	365.37	290.42	655.8	105.06	1987.82	1130.91
Portulaca oleracea	329.24	338.33	667.57	33.03	168.63	420.84
Portulaca oleracea	332.86	291.7	624.56	48.7	103.04	709.07
Portulaca oleracea	317.29	226.7	543.99	62.29	306.63	676.9
Alternanthera sessilis	476.89	204.79	681.68	154.93	462.77	598.23
Alternanthera sessilis	445.31	221.83	667.14	133.46	307.92	205.06
Alternanthera sessilis	414.44	212.25	626.69	122.04	341.04	572.28
Scoparia dulcis	721.71	484.82	1206.53	146.42	633.26	999.92
Scoparia dulcis	520.07	379.37	899.45	98.21	649.42	1413.66
Scoparia dulcis	588.22	369.59	957.81	131.86	764.65	1416.59
Centella verticillata	348.55	338.72	687.28	42.55	807.26	657.41
Centella verticillata	358.98	307.58	666.56	53	965.06	799.07
Centella verticillata	387.84	292.19	680.03	77.69	662.58	728.99
Acalypha indica	498.7	269.31	768.01	206.92	640.46	1083.22
Acalypha indica	542.2	452.34	994.54	99.89	695.14	829.68
Acalypha indica	507.23	266.82	774.05	148.33	564.11	744.31
Synedrella nodiflora	315.62	275.67	591.28	57.49	219.23	1070.76
Synedrella nodiflora	365.53	272.21	637.73	80.3	361.93	1071.13
Synedrella nodiflora	373.49	296.17	669.66	77.07	402.75	791.7
Persicaria lapathifolia	347.88	169.22	517.1	107.86	1373.87	1766.72
Persicaria lapathifolia	333.33	192.37	525.7	90.73	1740.03	2026.41
Persicaria lapathifolia	327.93	174.3	502.24	97.7	1719.77	1790.2
Ageratum conyzoides	502.04	337.99	840.03	123.9	540.51	1052.19
Ageratum conyzoides	497.8	310.51	808.31	127.75	502.08	1165.64
Ageratum conyzoides	523.49	255	778.49	162.39	563.99	711.84
Trema orientalis	376.87	232.18	609.05	94.48	492.47	975.64
Trema orientalis	378.96	221.81	600.76	99.36	498.26	788.72
Trema orientalis	377.36	241.5	618.86	90.71	475.5	727.09
Senna occidentalis	372.59	199.83	572.41	141.02	1141.12	1840.75
Senna occidentalis	356.09	177.09	533.17	143.2	1046.87	2038.31
Senna occidentalis	374.23	193	567.23	149.21	1179.97	1656.66
Parthenium hysterophorus	297.25	343.69	640.94	17.55	1076.3	825.89
Parthenium hysterophorus	299.57	346.41	645.98	15.63	1016.44	802.44
Parthenium hysterophorus	302.83	348.56	651.38	19.04	1156.77	1011.11
Coccinia grandis	467.28	254.92	722.19	144.61	488.53	788.21
Coccinia grandis	460.54	269.94	730.47	137.86	657.59	893.54
Coccinia grandis	464.1	277.97	742.07	137.13	561.18	672.74
Bryophytllum calycinum	275.17	301.04	576.2	26.55	720.8	1087.03
Bryophytllum calycinum	273.78	294.59	568.37	27.37	704.58	883.57
Bryophytllum calycinum	332.38	263.49	595.87	60.73	662.9	700.78
Ruellia tuberosa	337.54	219.43	556.97	96	1352.99	2243.3
Ruellia tuberosa	340.28	214.36	554.64	95.56	1285.17	2619.83
Ruellia tuberosa	332.07	218.39	550.46	91.14	1390.6	2050.74
Enhydra fluctuans	294.75	246.89	541.65	55.42	1017.84	1488.7
Enhydra fluctuans	296.06	249.98	546.04	54.39	864.72	1442.25
Enhydra fluctuans	317.76	262.77	580.53	56.58	888.68	1488.63
Tridax procumbens	307.7	238.2	545.9	64.51	1242.84	1874.51
Tridax procumbens	311.06	230.13	548.04	69.25	1357.34	1956.54
Tridax procumbens	312.12	236.33	548.46	66.54	1322.29	1963.22
