# Supplementary material for: An investigation of the pigments, antioxidants and free radical scavenging potential of twenty medicinal weeds found in the southern part of Bangladesh
Source: PeerJ. 2024 Jul 23;12:e17698. doi: 10.7717/peerj.17698 (PMC11276756; doi:10.7717/peerj.17698)
Supplement: Supplemental Information 3 [file peerj-12-17698-s003.xlsx]

## Sheet: Stem pigments
Plant Species	Abs.(470)	Abs.(649)	Abs.(664)
Oxalis corniculata	1.5	0.76	1.2
Oxalis corniculata	1.57	0.76	1.21
Oxalis corniculata	1.17	0.657	1.053
Heliotropium indicum	1.72	0.85	1.487
Heliotropium indicum	1.457	0.687	1.324
Heliotropium indicum	1.67	0.75	1.51
Eclipta postrata	0.807	0.351	0.634
Eclipta postrata	0.701	0.31	0.562
Eclipta postrata	0.726	0.405	0.661
Euphorbia hirta	1.488	0.734	1.276
Euphorbia hirta	0.981	0.47	0.81
Euphorbia hirta	1.602	0.507	0.889
Portulaca oleracea	1.196	0.528	0.992
Portulaca oleracea	1.196	0.518	0.966
Portulaca oleracea	0.702	0.305	0.575
Alternanthera sessilis	1.776	0.859	1.51
Alternanthera sessilis	1.61	0.743	1.357
Alternanthera sessilis	0.904	0.404	0.78
Scoparia dulcis	0.99	0.494	0.958
Scoparia dulcis	1.86	0.9	1.72
Scoparia dulcis	1.637	0.781	1.51
Centella verticillata	1.12	0.668	1.04
Centella verticillata	1.29	0.7	1.187
Centella verticillata	1.1	0.58	0.984
Acalypha indica	2.525	0.67	1.3
Acalypha indica	1.442	0.661	1.225
Acalypha indica	1.54	0.706	1.303
Synedrella nodiflora	0.96	0.427	0.743
Synedrella nodiflora	0.813	0.357	0.676
Synedrella nodiflora	1.09	0.487	0.845
Persicaria lapathifolia	0.875	0.403	0.781
Persicaria lapathifolia	0.933	0.427	0.827
Persicaria lapathifolia	0.737	0.33	0.637
Ageratum conyzoides	2.8	1.1	2.3
Ageratum conyzoides	2.7	1	2.3
Ageratum conyzoides	2.923	1.2	2.374
Trema orientalis	1.1	0.5	1
Trema orientalis	0.7	0.3	0.64
Trema orientalis	1.097	0.533	1.01
Senna occidentalis	1.815	0.656	1.062
Senna occidentalis	1.651	0.521	0.896
Senna occidentalis	1.939	0.632	1.081
Parthenium hysterophorus	0.707	0.36	0.69
Parthenium hysterophorus	0.726	0.377	0.718
Parthenium hysterophorus	0.797	0.394	0.749
Coccinia grandis	2.6	1.12	2
Coccinia grandis	2.574	1.165	1.967
Coccinia grandis	2.63	1.207	2.008
Bryophytllum calycinum	0.571	0.259	0.465
Bryophytllum calycinum	0.546	0.248	0.462
Bryophytllum calycinum	0.55	0.254	0.463
Ruellia tuberosa	1.131	0.549	0.827
Ruellia tuberosa	1.086	0.535	0.849
Ruellia tuberosa	1.02	0.531	0.78
Enhydra fluctuans	0.539	0.255	0.515
Enhydra fluctuans	0.563	0.271	0.544
Enhydra fluctuans	0.742	0.378	0.75
Tridax procumbens	0.584	0.293	0.528
Tridax procumbens	0.703	0.355	0.653
Tridax procumbens	0.695	0.36	0.665

## Sheet: Leaf pigments
Plant Species	Abs.(470)	Abs.(649)	Abs.(664)
Oxalis corniculata	2.796	1.276	2.29
Oxalis corniculata	2.59	1.07	1.915
Oxalis corniculata	3.066	1.517	2.37
Heliotropium indicum	3.163	1.5	2.485
Heliotropium indicum	3.435	1	2.717
Heliotropium indicum	2.31	1.3	2.393
Eclipta postrata	2.993	1.6	2.367
Eclipta postrata	3.011	1.7	2.362
Eclipta postrata	3.08	1.7	2.378
Euphorbia hirta	2.884	1.2	2.348
Euphorbia hirta	3.115	1.3	2.433
Euphorbia hirta	3.12	1.5	2.478
Portulaca oleracea	2.867	1.69	2.334
Portulaca oleracea	2.74	1.517	2.316
Portulaca oleracea	2.556	1.3121	2.225
Alternanthera sessilis	3.325	1.1	2.661
Alternanthera sessilis	3.21	1.2	2.58
Alternanthera sessilis	3.36	1.3	2.67
Scoparia dulcis	3.01	1.4	2.4
Scoparia dulcis	3.045	1.5	2.391
Scoparia dulcis	3.15	1.4	2.477
Centella verticillata	3.15	1.6	2.45
Centella verticillata	2.964	1.5	2.396
Centella verticillata	3.47	1.6	2.773
Acalypha indica	3.067	1.2	2.387
Acalypha indica	3.201	1.6	2.497
Acalypha indica	3.142	1.2	2.495
Synedrella nodiflora	3	1.5	2.368
Synedrella nodiflora	3.19	1.5	2.509
Synedrella nodiflora	3.115	1.5	2.496
Persicaria lapathifolia	3.198	1.2	2.505
Persicaria lapathifolia	2.912	1.2	2.3
Persicaria lapathifolia	3.056	1.2	2.398
Ageratum conyzoides	3.085	1.5	2.399
Ageratum conyzoides	3.055	1.5	2.367
Ageratum conyzoides	2.92	1.1	2.339
Trema orientalis	3.001	1.3	2.359
Trema orientalis	3.01	1.3	2.36
Trema orientalis	3.017	1.3	2.366
Senna occidentalis	3.162	1.1	2.409
Senna occidentalis	3.146	1.1	2.399
Senna occidentalis	3.143	1.1	2.393
Parthenium hysterophorus	3.078	1.8	2.374
Parthenium hysterophorus	3.046	1.8	2.37
Parthenium hysterophorus	3.068	1.8	2.37
Coccinia grandis	3.01	1.1	2.36
Coccinia grandis	3.04	1.1	2.36
Coccinia grandis	3.048	1.1	2.362
Bryophytllum calycinum	2.981	1.67	2.344
Bryophytllum calycinum	2.96	1.651	2.325
Bryophytllum calycinum	2.71	1.344	2.231
Ruellia tuberosa	3.089	1.2	2.379
Ruellia tuberosa	3.076	1.2	2.372
Ruellia tuberosa	3.087	1.2	2.378
Enhydra fluctuans	3.092	1.5	2.373
Enhydra fluctuans	3.077	1.5	2.36
Enhydra fluctuans	3.073	1.5	2.358
Tridax procumbens	3.038	1.4	2.35
Tridax procumbens	3.054	1.4	2.357
Tridax procumbens	3.069	1.4	2.365

## Sheet: Stem flavonoid
Plant Species	Abs. (510)
Oxalis corniculata	0.173
Oxalis corniculata	0.182
Oxalis corniculata	0.227
Heliotropium indicum	0.15
Heliotropium indicum	0.131
Heliotropium indicum	0.152
Eclipta postrata	0.062
Eclipta postrata	0.051
Eclipta postrata	0.038
Euphorbia hirta	0.105
Euphorbia hirta	0.071
Euphorbia hirta	0.078
Portulaca oleracea	0.027
Portulaca oleracea	0.004
Portulaca oleracea	0.099
Alternanthera sessilis	0.051
Alternanthera sessilis	0.026
Alternanthera sessilis	0.027
Scoparia dulcis	0.041
Scoparia dulcis	0.098
Scoparia dulcis	0.078
Centella verticillata	0.077
Centella verticillata	0.062
Centella verticillata	0.042
Acalypha indica	0.146
Acalypha indica	0.153
Acalypha indica	0.112
Synedrella nodiflora	0.095
Synedrella nodiflora	0.092
Synedrella nodiflora	0.107
Persicaria lapathifolia	0.152
Persicaria lapathifolia	0.191
Persicaria lapathifolia	0.189
Ageratum conyzoides	0.172
Ageratum conyzoides	0.128
Ageratum conyzoides	0.199
Trema orientalis	0.119
Trema orientalis	0.124
Trema orientalis	0.106
Senna occidentalis	0.27
Senna occidentalis	0.24
Senna occidentalis	0.29
Parthenium hysterophorus	0.178
Parthenium hysterophorus	0.162
Parthenium hysterophorus	0.186
Coccinia grandis	0.092
Coccinia grandis	0.142
Coccinia grandis	0.107
Bryophytllum calycinum	0.131
Bryophytllum calycinum	0.119
Bryophytllum calycinum	0.113
Ruellia tuberosa	0.311
Ruellia tuberosa	0.271
Ruellia tuberosa	0.267
Enhydra fluctuans	0.18
Enhydra fluctuans	0.136
Enhydra fluctuans	0.15
Tridax procumbens	0.191
Tridax procumbens	0.202
Tridax procumbens	0.157

## Sheet: Leaf flavonoid
Plant Species	Abs. (510)
Oxalis corniculata	0.276
Oxalis corniculata	0.256
Oxalis corniculata	0.278
Heliotropium indicum	0.173
Heliotropium indicum	0.182
Heliotropium indicum	0.227
Eclipta postrata	0.371
Eclipta postrata	0.363
Eclipta postrata	0.528
Euphorbia hirta	0.257
Euphorbia hirta	0.37
Euphorbia hirta	0.338
Portulaca oleracea	0.125
Portulaca oleracea	0.263
Portulaca oleracea	0.276
Alternanthera sessilis	0.236
Alternanthera sessilis	0.062
Alternanthera sessilis	0.235
Scoparia dulcis	0.361
Scoparia dulcis	0.525
Scoparia dulcis	0.545
Centella verticillata	0.23
Centella verticillata	0.288
Centella verticillata	0.254
Acalypha indica	0.411
Acalypha indica	0.315
Acalypha indica	0.272
Synedrella nodiflora	0.429
Synedrella nodiflora	0.424
Synedrella nodiflora	0.304
Persicaria lapathifolia	0.652
Persicaria lapathifolia	0.753
Persicaria lapathifolia	0.68
Ageratum conyzoides	0.42
Ageratum conyzoides	0.464
Ageratum conyzoides	0.269
Trema orientalis	0.388
Trema orientalis	0.307
Trema orientalis	0.283
Senna occidentalis	0.694
Senna occidentalis	0.797
Senna occidentalis	0.621
Parthenium hysterophorus	0.247
Parthenium hysterophorus	0.24
Parthenium hysterophorus	0.29
Coccinia grandis	0.286
Coccinia grandis	0.347
Coccinia grandis	0.245
Bryophytllum calycinum	0.392
Bryophytllum calycinum	0.335
Bryophytllum calycinum	0.266
Ruellia tuberosa	0.48
Ruellia tuberosa	0.654
Ruellia tuberosa	0.591
Enhydra fluctuans	0.583
Enhydra fluctuans	0.564
Enhydra fluctuans	0.571
Tridax procumbens	0.621
Tridax procumbens	0.636
Tridax procumbens	0.729

## Sheet: Stem total phenolics
Plant Species	Abs. (760)
Oxalis corniculata	0.196
Oxalis corniculata	0.333
Oxalis corniculata	0.226
Heliotropium indicum	0.221
Heliotropium indicum	0.174
Heliotropium indicum	0.48
Eclipta postrata	0.27
Eclipta postrata	0.198
Eclipta postrata	0.1152
Euphorbia hirta	0.965
Euphorbia hirta	0.545
Euphorbia hirta	0.698
Portulaca oleracea	0.254
Portulaca oleracea	0.196
Portulaca oleracea	0.09
Alternanthera sessilis	0.096
Alternanthera sessilis	0.111
Alternanthera sessilis	0.06
Scoparia dulcis	0.175
Scoparia dulcis	0.393
Scoparia dulcis	0.312
Centella verticillata	0.243
Centella verticillata	0.264
Centella verticillata	0.275
Acalypha indica	0.206
Acalypha indica	0.14
Acalypha indica	0.182
Synedrella nodiflora	0.156
Synedrella nodiflora	0.179
Synedrella nodiflora	0.173
Persicaria lapathifolia	0.518
Persicaria lapathifolia	0.554
Persicaria lapathifolia	0.424
Ageratum conyzoides	0.156
Ageratum conyzoides	0.179
Ageratum conyzoides	0.173
Trema orientalis	0.154
Trema orientalis	0.154
Trema orientalis	0.142
Senna occidentalis	0.459
Senna occidentalis	0.382
Senna occidentalis	0.429
Parthenium hysterophorus	0.491
Parthenium hysterophorus	0.477
Parthenium hysterophorus	0.656
Coccinia grandis	0.246
Coccinia grandis	0.178
Coccinia grandis	0.206
Bryophytllum calycinum	0.35
Bryophytllum calycinum	0.212
Bryophytllum calycinum	0.139
Ruellia tuberosa	2.179
Ruellia tuberosa	2.131
Ruellia tuberosa	1.318
Enhydra fluctuans	0.275
Enhydra fluctuans	0.27
Enhydra fluctuans	0.328
Tridax procumbens	0.847
Tridax procumbens	0.938
Tridax procumbens	0.539

## Sheet: Leaf total phenolics
Plant Species	Abs. (760)
Oxalis corniculata	0.119
Oxalis corniculata	0.134
Oxalis corniculata	0.155
Heliotropium indicum	1.531
Heliotropium indicum	1.019
Heliotropium indicum	0.91
Eclipta postrata	0.803
Eclipta postrata	1.341
Eclipta postrata	1.34
Euphorbia hirta	3.53
Euphorbia hirta	1.43
Euphorbia hirta	3.596
Portulaca oleracea	0.204
Portulaca oleracea	0.18
Portulaca oleracea	0.176
Alternanthera sessilis	0.618
Alternanthera sessilis	0.444
Alternanthera sessilis	0.558
Scoparia dulcis	0.565
Scoparia dulcis	0.823
Scoparia dulcis	1.148
Centella verticillata	1.208
Centella verticillata	1.614
Centella verticillata	1.089
Acalypha indica	0.464
Acalypha indica	0.466
Acalypha indica	0.477
Synedrella nodiflora
Synedrella nodiflora	0.289
Synedrella nodiflora	0.299
Persicaria lapathifolia	2.022
Persicaria lapathifolia	2.493
Persicaria lapathifolia	2.463
Ageratum conyzoides	0.27
Ageratum conyzoides	0.39
Ageratum conyzoides	0.199
Trema orientalis	0.418
Trema orientalis	0.407
Trema orientalis	0.443
Senna occidentalis	0.994
Senna occidentalis	0.946
Senna occidentalis	0.98
Parthenium hysterophorus	1.277
Parthenium hysterophorus	1.233
Parthenium hysterophorus	1.396
Coccinia grandis	0.53
Coccinia grandis	0.633
Coccinia grandis	0.603
Bryophytllum calycinum	0.803
Bryophytllum calycinum	0.825
Bryophytllum calycinum	0.643
Ruellia tuberosa	1.219
Ruellia tuberosa	1.266
Ruellia tuberosa	1.486
Enhydra fluctuans	1.156
Enhydra fluctuans	1.057
Enhydra fluctuans	1.041
Tridax procumbens	1.539
Tridax procumbens	1.71
Tridax procumbens	1.842

## Sheet: Stem DPPH
	Abs. at 517nm for different dilution
Plant Species	0	2	5	10	15	30
Oxalis corniculata	0.526	0.644	0.696	0.782	0.822	0.834
Oxalis corniculata	0.242	0.459	0.616	0.71	0.744	0.798
Oxalis corniculata	0.26	0.184	0.489	0.418	0.595	0.743
Heliotropium indicum	0.119	0.174	0.554	0.694	0.719	0.785
Heliotropium indicum	0.111	0.164	0.506	0.678	0.732	0.75
Heliotropium indicum	0.129	0.173	0.56	0.614	0.644	0.735
Eclipta postrata	0.331	0.487	0.736	0.872	0.895	0.962
Eclipta postrata	0.52	0.726	0.839	0.894	0.938	0.988
Eclipta postrata	0.482	0.643	0.824	0.877	0.944	1.012
Euphorbia hirta	0.111	0.136	0.373	0.59	0.735	0.896
Euphorbia hirta	0.115	0.115	0.363	0.595	0.727	0.896
Euphorbia hirta	0.097	0.139	0.461	0.469	0.77	0.808
Portulaca oleracea	0.327	0.734	0.895	0.942	0.987	0.995
Portulaca oleracea	0.339	0.831	0.942	0.961	0.975	0.979
Portulaca oleracea	0.335	0.657	0.902	0.955	0.98	0.968
Alternanthera sessilis	0.787	0.849	0.951	0.952	0.96	0.985
Alternanthera sessilis	0.805	0.839	0.911	0.929	0.952	0.979
Alternanthera sessilis	0.735	0.855	0.93	0.984	0.991	1.003
Scoparia dulcis	0.608	0.746	0.872	0.915	0.918	0.951
Scoparia dulcis	0.363	0.602	0.784	0.87	0.902	0.932
Scoparia dulcis	0.372	0.491	0.806	0.888	0.896	0.982
Centella verticillata	0.382	0.616	0.794	0.869	0.87	0.89
Centella verticillata	0.367	0.63	0.785	0.876	0.909	0.944
Centella verticillata	0.364	0.61	0.805	0.892	0.905	0.932
Acalypha indica	0.427	0.689	0.828	0.965	0.932	0.992
Acalypha indica	0.43	0.698	0.927	0.902	0.074	0.966
Acalypha indica	0.407	0.643	0.892	0.913	0.923	0.991
Synedrella nodiflora	0.698	0.85	0.872	0.977	0.995	0.998
Synedrella nodiflora	0.818	0.865	0.876	1.007	1.014	1.003
Synedrella nodiflora	0.734	0.844	0.882	1.021	1.03	1.039
Persicaria lapathifolia	0.096	0.425	0.677	0.809	0.856	0.96
Persicaria lapathifolia	0.083	0.111	0.545	0.752	0.818	0.952
Persicaria lapathifolia	0.092	0.389	0.643	0.734	0.844	0.964
Ageratum conyzoides	0.364	0.701	0.871	0.967	0.923	0.926
Ageratum conyzoides	0.544	0.725	0.872	0.923	0.942	0.96
Ageratum conyzoides	0.455	0.643	0.872	0.944	0.945	0.974
Trema orientalis	0.737	0.735	0.805	0.893	0.94	0.97
Trema orientalis	0.592	0.704	0.727	0.734	0.789	0.837
Trema orientalis	0.706	0.717	0.734	0.75	0.777	0.892
Senna occidentalis	0.439	0.629	0.786	0.79	0.849	0.857
Senna occidentalis	0.481	0.698	0.791	0.814	0.82	0.831
Senna occidentalis	0.422	0.643	0.763	0.824	0.834	0.858
Parthenium hysterophorus	0.034	0.074	0.472	0.596	0.615	0.698
Parthenium hysterophorus	0.03	0.045	0.336	0.556	0.539	0.651
Parthenium hysterophorus	0.029	0.055	0.32	0.573	0.512	0.692
Coccinia grandis	0.343	0.533	0.632	0.705	0.754	0.822
Coccinia grandis	0.372	0.572	0.644	0.687	0.732	0.741
Coccinia grandis	0.389	0.601	0.696	0.705	0.745	0.736
Bryophytllum calycinum	0.07	0.263	0.594	0.771	0.789	0.808
Bryophytllum calycinum	0.093	0.282	0.714	0.834	0.847	0.85
Bryophytllum calycinum	0.089	0.293	0.688	0.842	0.884	0.886
Ruellia tuberosa	0.08	0.08	0.1	0.531	0.6	0.824
Ruellia tuberosa	0.061	0.091	0.101	0.491	0.624	0.816
Ruellia tuberosa	0.051	0.094	0.099	0.473	0.615	0.83
Enhydra fluctuans	0.408	0.691	0.734	0.834	0.877	0.885
Enhydra fluctuans	0.426	0.738	0.762	0.865	0.888	0.899
Enhydra fluctuans	0.295	0.583	0.732	0.829	0.84	0.854
Tridax procumbens	0.047	0.06	0.399	0.614	0.704	0.758
Tridax procumbens	0.117	0.126	0.289	0.461	0.563	0.633
Tridax procumbens	0.079	0.19	0.312	0.512	0.706	0.743

## Sheet: Leaf DPPH
	Abs. at 517nm for different dilution
Plant Species	0	2	5	10	15	30
Oxalis corniculata	0.628	0.632	0.724	0.742	0.79	0.822
Oxalis corniculata	0.201	0.309	0.603	0.687	0.745	0.796
Oxalis corniculata	0.613	0.733	0.744	0.752	0.791	0.86
Heliotropium indicum	0.106	0.175	0.393	0.481	0.535	0.605
Heliotropium indicum	0.101	0.172	0.353	0.464	0.551	0.651
Heliotropium indicum	0.108	0.181	0.19	0.47	0.398	0.669
Eclipta postrata	0.326	0.379	0.472	0.688	0.755	0.912
Eclipta postrata	0.352	0.37	0.524	0.714	0.804	1.003
Eclipta postrata	0.325	0.398	0.542	0.705	0.813	1.012
Euphorbia hirta	0.108	0.177	0.403	0.495	0.713	0.691
Euphorbia hirta	0.109	0.113	0.389	0.461	0.66	0.742
Euphorbia hirta	0.117	0.126	0.479	0.551	0.75	0.768
Portulaca oleracea	0.632	0.849	0.959	1.035	1.057	1.015
Portulaca oleracea	0.389	0.835	0.971	1.024	1.083	1.079
Portulaca oleracea	0.488	0.849	0.977	1.043	1.061	1.073
Alternanthera sessilis	0.319	0.333	0.667	0.818	0.876	0.944
Alternanthera sessilis	0.32	0.337	0.689	0.813	0.835	0.908
Alternanthera sessilis	0.323	0.414	0.696	0.829	0.84	0.909
Scoparia dulcis	0.134	0.206	0.676	0.784	0.822	0.843
Scoparia dulcis	0.165	0.118	0.357	0.585	0.675	0.749
Scoparia dulcis	0.173	0.206	0.44	0.693	0.804	0.895
Centella verticillata	0.077	0.094	0.11	0.359	0.539	0.697
Centella verticillata	0.08	0.11	0.113	0.473	0.632	0.788
Centella verticillata	0.071	0.111	0.117	0.482	0.623	0.692
Acalypha indica	0.279	0.49	0.804	0.825	0.91	0.958
Acalypha indica	0.284	0.492	0.884	0.905	0.914	1.007
Acalypha indica	0.287	0.551	0.895	0.913	0.958	1.011
Synedrella nodiflora	0.291	0.651	0.922	0.964	0.971	0.976
Synedrella nodiflora	0.308	0.672	0.89	0.967	0.978	1.017
Synedrella nodiflora	0.282	0.682	0.876	0.949	0.985	1.021
Persicaria lapathifolia	0.136	0.148	0.195	0.251	0.538	0.7
Persicaria lapathifolia	0.113	0.167	0.176	0.229	0.504	0.642
Persicaria lapathifolia	0.117	0.161	0.19	0.263	0.464	0.662
Ageratum conyzoides	0.512	0.688	0.842	0.886	0.887	0.951
Ageratum conyzoides	0.175	0.468	0.848	0.899	0.902	0.907
Ageratum conyzoides	0.699	0.843	0.851	0.864	0.923	0.942
Trema orientalis	0.729	0.899	0.902	0.98	1.053	0.995
Trema orientalis	0.793	0.829	0.907	0.911	0.915	0.917
Trema orientalis	0.768	0.834	0.949	0.976	0.985	1.021
Senna occidentalis	0.356	0.472	0.605	0.623	0.717	0.717
Senna occidentalis	0.386	0.479	0.661	0.672	0.693	0.865
Senna occidentalis	0.37	0.497	0.644	0.683	0.715	0.81
Parthenium hysterophorus	0.024	0.083	0.12	0.362	0.526	0.743
Parthenium hysterophorus	0.074	0.108	0.192	0.45	0.58	0.692
Parthenium hysterophorus	0.079	0.117	0.193	0.416	0.533	0.734
Coccinia grandis	0.173	0.308	0.619	0.785	0.818	0.876
Coccinia grandis	0.173	0.379	0.592	0.699	0.729	0.752
Coccinia grandis	0.174	0.381	0.591	0.645	0.786	0.835
Bryophytllum calycinum	0.967	0.165	0.279	0.548	0.642	0.763
Bryophytllum calycinum	0.913	0.131	0.305	0.567	0.633	0.828
Bryophytllum calycinum	0.931	0.123	0.29	0.591	0.642	0.824
Ruellia tuberosa	0.132	0.153	0.286	0.68	0.82	1.064
Ruellia tuberosa	0.129	0.146	0.291	0.688	0.824	1.021
Ruellia tuberosa	0.111	0.139	0.282	0.61	0.834	1.039
Enhydra fluctuans	0.176	0.188	0.552	0.693	0.745	0.834
Enhydra fluctuans	0.169	0.164	0.553	0.672	0.743	0.795
Enhydra fluctuans	0.167	0.179	0.609	0.715	0.805	0.809
Tridax procumbens	0.127	0.199	0.361	0.44	0.483	0.594
Tridax procumbens	0.147	0.192	0.361	0.403	0.482	0.661
Tridax procumbens	0.47	0.208	0.37	0.412	0.512	0.706
